# Supplementary material
Source: PubMed Central journal article supplement (PMC2753718)
Supplement: NIHMS129292-supplement-1.pdf [file NIHMS129292-supplement-1.pdf]

**Supplemental Table. Characteristics of Eyes with Ocular Inflammation Upon Initiation of Azathioprine, by Type of Inflammation**

| Ocular Inflammation                             | Anterior Uveitis | Intermediate Uveitis | Posterior/Panuveitis | Scleritis | Mucous Membrane Pemphigoid | Other Ocular Inflammatory Diseases | Total       |
|-------------------------------------------------|------------------|----------------------|----------------------|-----------|----------------------------|------------------------------------|-------------|
| Ocular complications, affected eyes, %          | 21 (60.0%)       | 20 (64.5%)           | 49 (54.4%)           | 2 (7.4%)  | 9 (14.1%)                  | 1 (12.5%)                          | 102 (40.0%) |
| - Prior cataract surgery*                       | 16 (45.7%)       | 8 (25.8%)            | 19 (21.1%)           | 1 (3.7%)  | 9 (14.1%)                  | 0 (0.0%)                           | 53 (20.8%)  |
| - Macular edema                                 | 5 (17.2%)        | 11 (37.9%)           | 15 (17.9%)           | 0 (0.0%)  | 0 (0.0%)                   | 0 (0.0%)                           | 31 (17.1%)  |
| - Epiretinal membrane                           | 3 (10.3%)        | 3 (10.3%)            | 17 (20.2%)           | 0 (0.0%)  | 0 (0.0%)                   | 0 (0.0%)                           | 23 (12.7%)  |
| - Ocular hypertension ( $\geq 21$ mmHg)         | 3 (8.6%)         | 2 (6.5%)             | 8 (9.6%)             | 1 (4.0%)  | 2 (9.1%)                   | 1 (16.7%)                          | 17 (8.4%)   |
| - Ocular hypertension ( $\geq 30$ mmHg)         | 3 (8.6%)         | 0 (0.0%)             | 1 (1.2%)             | 0 (0.0%)  | 0 (0.0%)                   | 1 (16.7%)                          | 5 (2.5%)    |
| - Prior glaucoma surgery                        | 0 (0.0%)         | 1 (3.2%)             | 4 (4.4%)             | 0 (0.0%)  | 0 (0.0%)                   | 0 (0.0%)                           | 5 (2.0%)    |
| - Band keratopathy                              | 2 (5.9%)         | 0 (0.0%)             | 2 (2.9%)             | 0 (0.0%)  | 0 (0.0%)                   | 0 (0.0%)                           | 4 (1.8%)    |
| - Exudative retinal detachment                  | 0 (0.0%)         | 0 (0.0%)             | 2 (2.4%)             | 0 (0.0%)  | 0 (0.0%)                   | 0 (0.0%)                           | 2 (1.1%)    |
| - Retinal or choroidal neovascularization       | 0 (0.0%)         | 0 (0.0%)             | 1 (1.2%)             | 0 (0.0%)  | 0 (0.0%)                   | 0 (0.0%)                           | 1 (0.6%)    |
| - Hypotony                                      | 0 (0.0%)         | 0 (0.0%)             | 1 (1.2%)             | 0 (0.0%)  | 0 (0.0%)                   | 0 (0.0%)                           | 1 (0.5%)    |
| <b>Anterior chamber cells (affected eye, %)</b> |                  |                      |                      |           |                            |                                    |             |
| - No cell                                       | 18 (51.4%)       | 20 (64.5%)           | 71 (78.9%)           | 27 (100%) | 64 (100%)                  | 8 (100%)                           | 208 (81.6%) |
| - 0.5+                                          | 4 (11.4%)        | 5 (16.1%)            | 10 (11.1%)           | 0 (0.0%)  | 0 (0.0%)                   | 0 (0.0%)                           | 19 (7.5%)   |
| - 1.0+                                          | 8 (22.9%)        | 4 (12.9%)            | 4 (4.4%)             | 0 (0.0%)  | 0 (0.0%)                   | 0 (0.0%)                           | 16 (6.3%)   |
| - 2.0+ or more                                  | 4 (11.4%)        | 2 (6.5%)             | 5 (5.6%)             | 0 (0.0%)  | 0 (0.0%)                   | 0 (0.0%)                           | 11 (4.3%)   |
| - Missing                                       | 1 (2.9%)         | 0 (0.0%)             | 0 (0.0%)             | 0 (0.0%)  | 0 (0.0%)                   | 0 (0.0%)                           | 1 (0.4%)    |
| <b>Vitreous cells (affected eye, %)</b>         |                  |                      |                      |           |                            |                                    |             |
| - No cell                                       | 19 (54.3%)       | 20 (64.5%)           | 59 (65.6%)           | 27 (100%) | 46 (71.9%)                 | 8 (100%)                           | 179 (70.2%) |
| - 0.5+                                          | 5 (14.3%)        | 9 (29.0%)            | 11 (12.2%)           | 0 (0.0%)  | 0 (0.0%)                   | 0 (0.0%)                           | 25 (9.8%)   |
| - 1.0+                                          | 5 (14.3%)        | 1 (3.2%)             | 6 (6.7%)             | 0 (0.0%)  | 0 (0.0%)                   | 0 (0.0%)                           | 12 (4.7%)   |
| - 2.0+ or more                                  | 3 (8.6%)         | 1 (3.2%)             | 11 (12.2%)           | 0 (0.0%)  | 0 (0.0%)                   | 0 (0.0%)                           | 15 (5.9%)   |
| - Missing                                       | 3 (8.6%)         | 0 (0.0%)             | 3 (3.3%)             | 0 (0.0%)  | 18 (28.1%)                 | 0 (0.0%)                           | 24 (9.4%)   |
| <b>Vitreous haze (affected eye, %)</b>          |                  |                      |                      |           |                            |                                    |             |
| - None                                          | 31 (88.6%)       | 23 (74.2%)           | 70 (77.8%)           | 27 (100%) | 46 (71.9%)                 | 8 (100%)                           | 205 (80.4%) |
| - 0.5+                                          | 0 (0.0%)         | 6 (19.4%)            | 9 (10.0%)            | 0 (0.0%)  | 0 (0.0%)                   | 0 (0.0%)                           | 15 (5.9%)   |
| - 1.0+                                          | 2 (5.7%)         | 2 (6.5%)             | 8 (8.9%)             | 0 (0.0%)  | 0 (0.0%)                   | 0 (0.0%)                           | 12 (4.7%)   |
| - Missing                                       | 2 (5.7%)         | 0 (0.0%)             | 3 (3.3%)             | 0 (0.0%)  | 18 (28.1%)                 | 0 (0.0%)                           | 23 (9.0%)   |

\* prior cataract surgery included pseudophakic and aphakic patients at baseline

Note: The denominator in each of these was variable depending availability of data collection at outset of azathioprine therapy.
